# Supplementary material for: An 800-kyr planktonic 𝜹 18 O stack for the West Pacific Warm Pool
Source: Copernicus journal article supplement (doi:10.5194/essd-2023-335), 2023-08-24
Supplement: Supplementary file [file essd-2023-335-RC1-supplement.pdf]

The authors provide a nice western Pacific warm pool planktonic foraminifera oxygen isotope during the past 800 ka with novel stack method. This is important and timely for the further paleoceanography studies in this region. There are just few minor points I would like to ask the authors to address.

#### Lack of references in the introduction section

In the introduction section, the authors largely rely on only very few references (Lea et al., 2000 and Tachikawa et al., 2014) to present some basic description of western Pacific warm pool region. Although these 2 references are crucial and important, however, these are definitely not modern physical oceanography papers. If the authors would like to make the reference list be more concise, then perhaps the authors could add “and references therein” to clarify is not just these 2 references for the whole previous physical oceanography studies in the warm pool region. Or the better way, to cite some physical oceanography observational papers in the first 2 paragraphs of introduction section.

Figure 1: what is the software to make this figure? The authors only mentioned the reference for SST dataset.

Line 78-80, should be “30 m” and “20-75 m”; Also, although the original reference from Chuang et al. (2018) used “*G. sacculifer*”. The genus name has been revised as “*Trilobatus sacculifer*; *T. sacculifer*”.

Table 1: I wonder why the authors did not include Medina-Elizalde et al. (2005)’s ODP 806 data?

Also, “180-1115B” data should be “ODP 1115B”, please revise it through the text, figure 1, and Tables.

Lastly, Lo et al. (2017) only report data back to 350 ka, but the dataset of MD05-2925 here is back to ~462(?) ka. Please clarify.

Lines 128-130, please describe why the authors would like to set the reservoir age as zero?

Line 150, should be “29oC”

Lines 186-187, if the authors take the uncertainty into account would the 1.3 permil significantly different from 1.7-1.8 permil glacial/interglacial changes? Please clarify.

Section 6.1, perhaps the authors could also refer to cores used in this study with both benthic and planktonic foraminifera d18O stratigraphy. For example, MD05-2925, Lo et al. (2017) several other reports in this core have reported there is no clear timing differences for the past 5-6 terminations (Liu et al., 2015, Lo et al., 2022).

The title of Figure 7 is not clear, what kind of “contributions” that the authors would like to address in this figure?
